# Supplementary material
Source: Research Square preprint supplement (doi:10.21203/rs.3.rs-8469484/v1)
Supplement: Supplementary file 1 [file afd94fd94329c42229e10dc2.docx]

**Efficacy and safety of aggressive hydration for preventing post-endoscopic retrograde cholangiopancreatography pancreatitis: study protocol for a phase 3, multicenter, open-label, randomized controlled study**

Reiko Yamada, et al.

**Additional File 1. Statistical analysis**

***Observation and treatment information***

For continuous variables, the mean and standard deviation will be calculated for each group, and Student’s *t*-tests will be performed to assess differences between the treatment groups. For categorical variables such as sex, use of antithrombotic agents, indication for endoscopic retrograde cholangiopancreatography (ERCP), medical history, and diclofenac dose (25 mg or 50 mg), frequency distribution tables will be generated for each group, and Fisher’s exact tests will be applied to compare proportions between the two groups. For Eastern Cooperative Oncology Group performance status, the median and interquartile range will be calculated for each group (standard infusion vs loading infusion), and the Mann–Whitney U test will be used to assess intergroup differences.

***Primary endpoint***The primary hypothesis of this study is that “Ringer’s solution loading reduces the incidence of post-ERCP pancreatitis (PEP).” Accordingly, the null hypothesis is that “Ringer’s solution loading does not alter the incidence of PEP.” The incidence of PEP between the standard infusion and loading infusion groups will be compared using Fisher’s exact test, with a two-sided significance level of α = 0.05.

***Secondary endpoints***The incidence of hyperamylasemia will be compared between the standard infusion and loading infusion groups using Fisher’s exact test with a two-sided α = 0.05. For PEP stratified by severity (mild, moderate, severe), frequency distribution tables will be generated for each group, and Fisher’s exact test will be used to compare severity distributions between the two groups.

***Safety assessment***For infusion-related adverse events (respiratory failure, peripheral edema, cerebral edema), frequency distribution tables will be generated for each group, and Fisher’s exact test will be performed to evaluate differences between the standard infusion and loading infusion groups.
